# Supplementary material for: High-capacity full lithium-ion cells based on nanoarchitectured ternary manganese–nickel–cobalt carbonate and its lithiated derivative
Source: Royal Society of Chemistry journal article supplement (doi:10.1039/c4ta02574a), 2014-07-10
Supplement: c4ta02574a1.pdf [file c4ta02574a1.pdf]

## **Electronic Supplementary Information**

### **High-Capacity Full Lithium-Ion Cells Based on Nanoarchitected Ternary Manganese-Nickel-Cobalt Carbonate and Its Lithiated Derivative**

*Jianqing Zhao, Ying Wang\**

Department of Mechanical & Industrial Engineering, Louisiana State University, Baton Rouge,  
Louisiana 70803, United States

\*Corresponding Author:

Prof. Ying Wang, Tel: 001-225-578-8577; Fax: 001-225-578-9162; E-mail: [ywang@lsu.edu](mailto:ywang@lsu.edu)

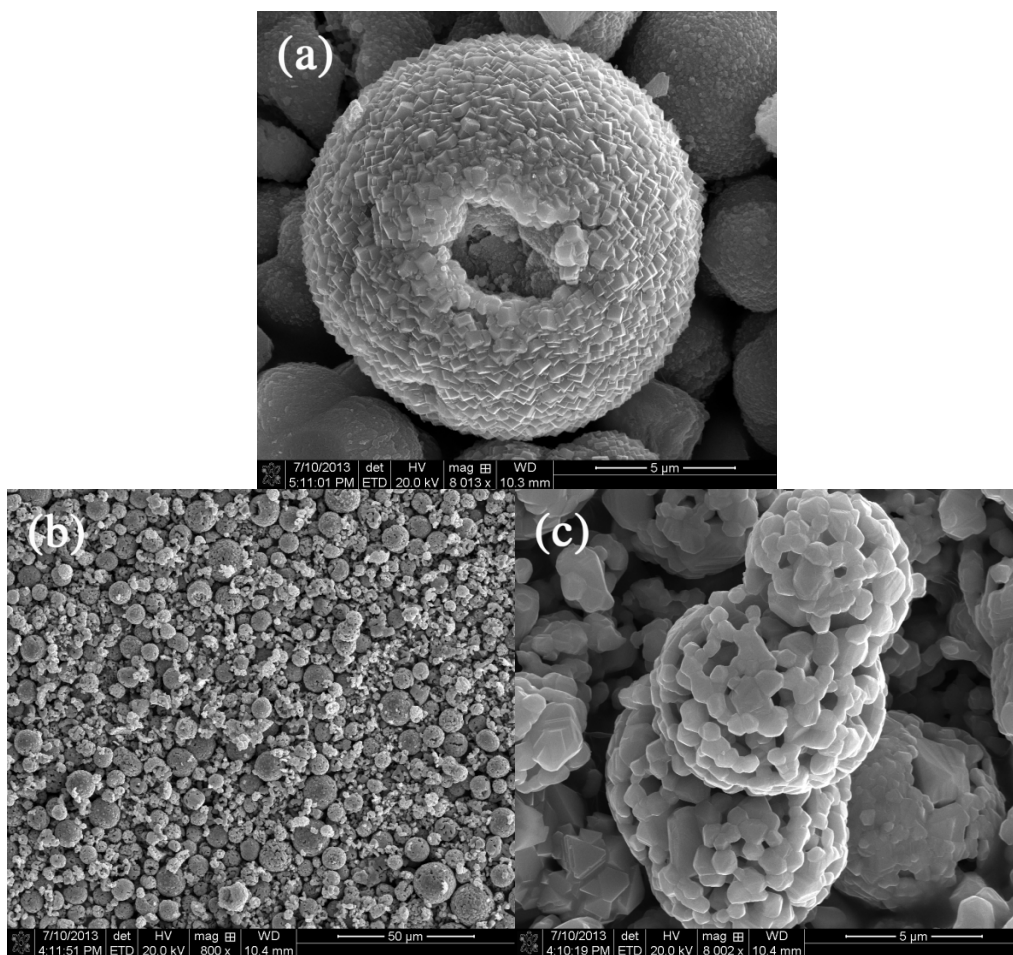

**Fig. S1** SEM images of (a) slightly-broken sphere of multi-shell ternary transition metal carbonate compound, and (b) and (c) derivatives after sintering carbonate in air at 900°C in 12 h.

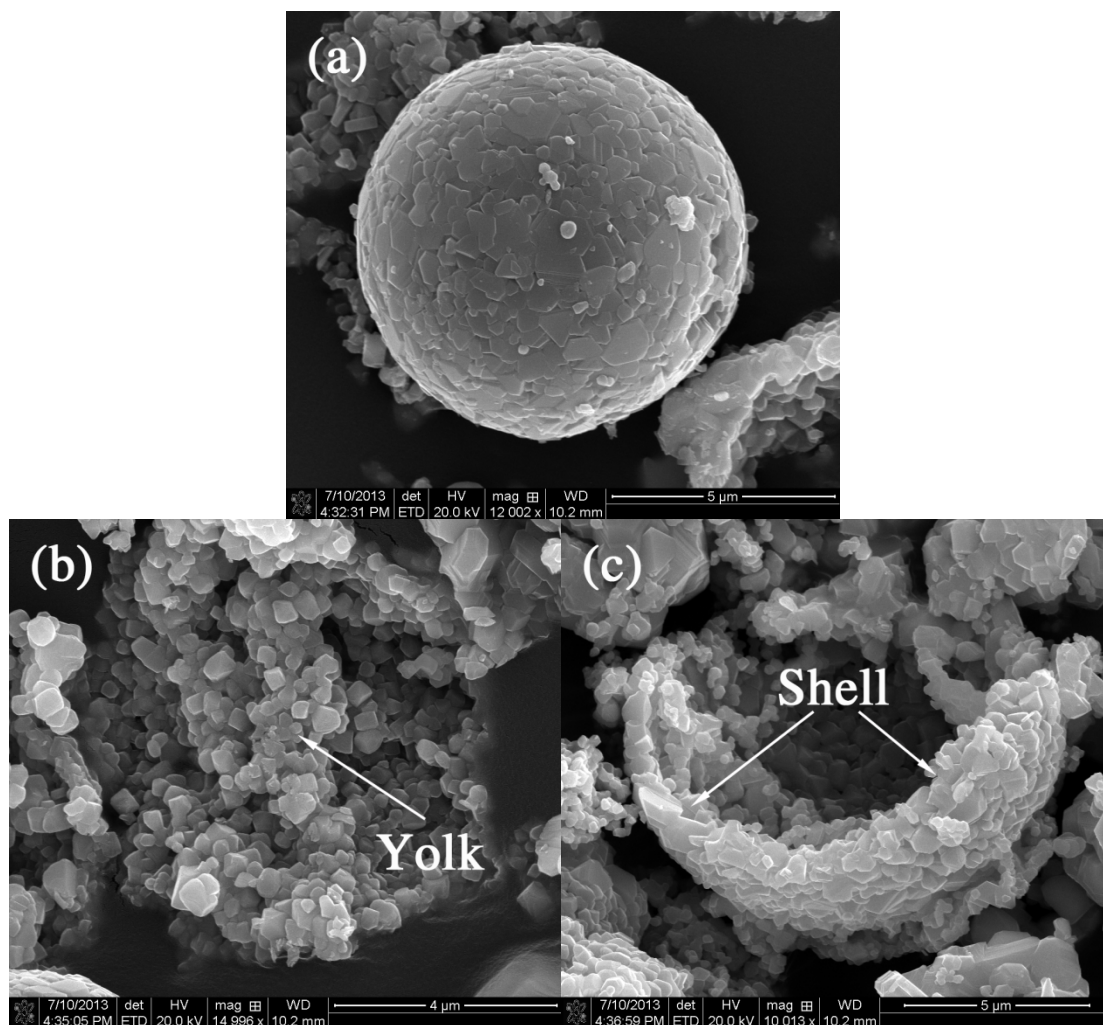

**Fig. S2** SEM images of yolk-shell-structured Li-excess  $\text{Li}[\text{Li}_{0.2}\text{Mn}_{0.54}\text{Ni}_{0.13}\text{Co}_{0.13}]\text{O}_2$ : (a) an intact sphere, (b) a broken sphere showing the yolk structure inside, and (c) a broken sphere showing the shell.

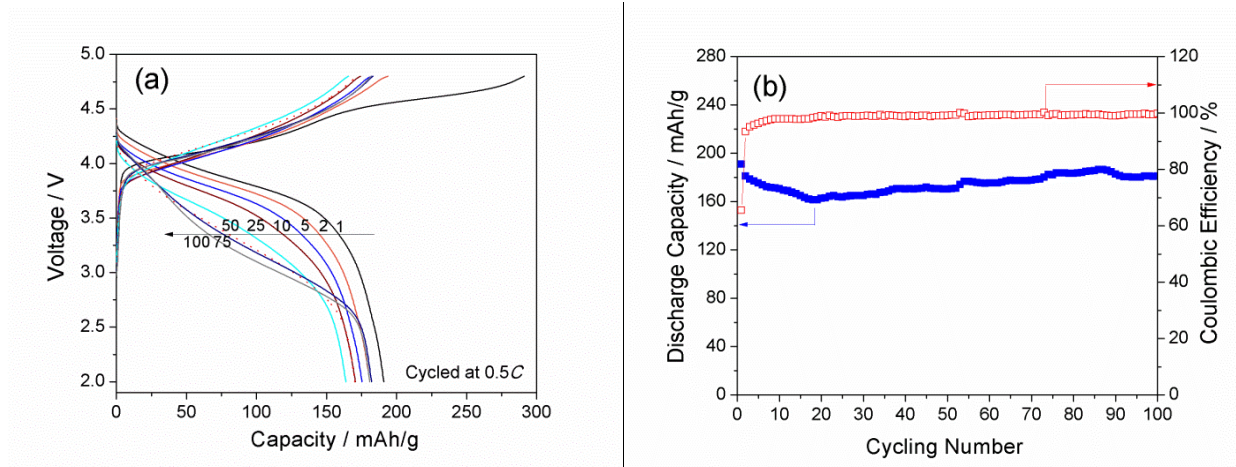

**Fig. S3** Cycling performance of yolk-shell-structured Li-excess  $\text{Li}[\text{Li}_{0.2}\text{Mn}_{0.54}\text{Ni}_{0.13}\text{Co}_{0.13}]\text{O}_2$  as lithium-ion battery cathode material in half battery cell testing with lithium metal as the counter electrode at 0.5 C ( $1C = 250 \text{ mA/g}$ ) in a voltage range of 2.0 - 4.8 V vs.  $\text{Li/Li}^+$ : (a) charge and discharge curves at the 1, 2, 5, 10, 25, 50, 75 and 100<sup>th</sup> cycle, and (b) capacity retention and Coulombic efficiency as a function of cycle number.

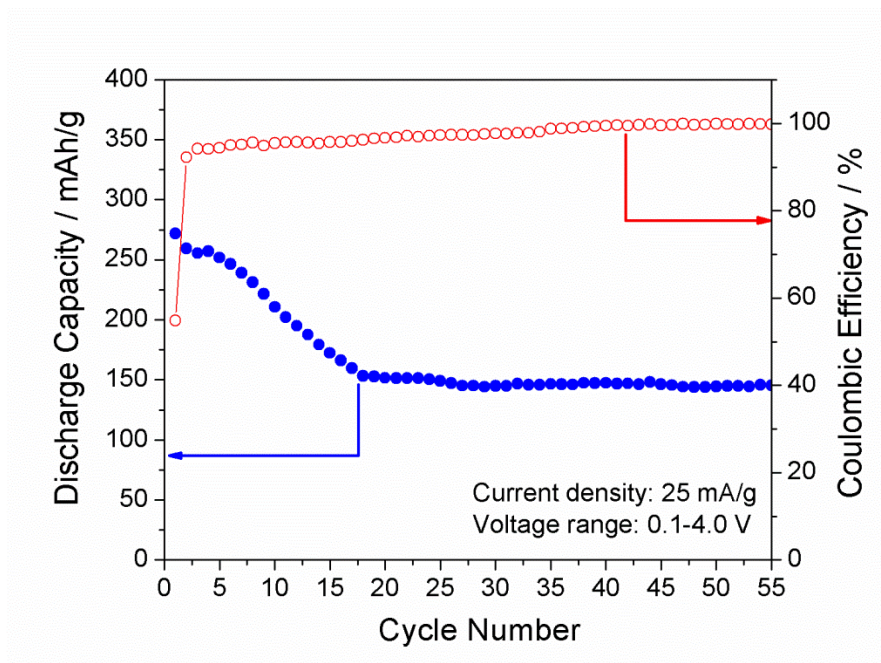

**Fig. S4** Discharge capacity and Coulombic efficiency of a full lithium-ion battery based on  $\text{MNCCO}_3$  MS anode and LMNCO YS cathode as a function of cycle number when cycled at 25 mA/g in a voltage range of 0.1 - 4.0 V.
